# Supplementary material
Source: publisher site journal article supplement (https://www.dovepress.com/article/387127)
Supplement: Supplementary file 1 [file get_supplementary_file.php]

**Supplemental Figure 1** Negative controls for immunohistochemistry staining of p-ERK and immunofluorescence staining of proBDNF, p75NTR and p-p65.


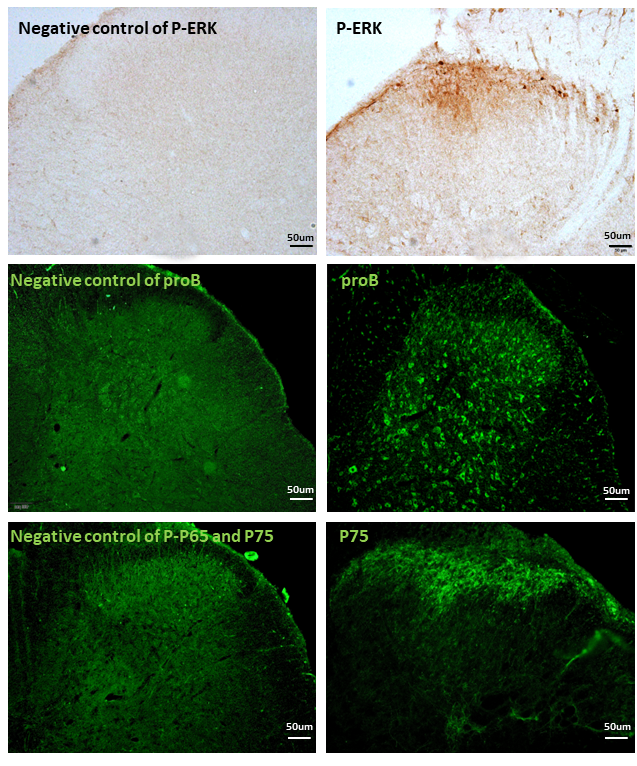


**Supplemental Table 1 Primers of genes used in PCR analysis**

| Primer | Forward | Reverse |
| --- | --- | --- |
| **TNF-α** | TTGCTCTGTGAAGGGAATGG | GGCTCTGAGGAGTAGACAATAAAG |
| **IL-6** | CTGCAAGAGACTTCCATCCAG | AGTGGTATAGACAGGTCTGTTGG |
| **GAPDH** | GCATCCTGGGCTACACTGAG | TGGTCCTCAGTGTAGCCCAAG |

**Abbreviations:** TNF-α, Tumor necrosis factor alpha; IL-6, interleukin 6;GAPDH, glyceraldehyde-3-phosphate dehydrogenase.
